# Supplementary material
Source: Research Square preprint supplement (doi:10.21203/rs.3.rs-9159939/v1)
Supplement: Supplementary file 1 [file 655e101be1dcc25ad410d5cf.docx]

# Appendix A: Articles of the Systematic Literature Review

From the total of 195 articles, only 170 were teacher-related (i.e. reported by or concerning teachers). Of these 170 articles, 65 articles included research in the natural sciences (NS) domain, and 113 articles in the social sciences and humanities (SSH) domain (some articles concern both domains). In this appendix, you can find an overview of (1) the 170 articles used in this systematic review and (2) the resting non teacher-related 25 articles.

Articles in this review

Ado G (2015) Preparing Science Teachers to Address Contentious and Sensitive Science Topics. J Health Educ Teach 6:57–71

Alave JC, Ancho I V. (2023) Gender and Sports: The Experiences of Filipino Coaches. Journal of Multidisciplinary in Social Sciences 19:33–44

Albert K (2022) “All I do is present what is given to us as the facts”: Progressive sex education and the reproduction of inequality in public school classrooms. Can J Hum Sex 31:103–116. https://doi.org/10.3138/cjhs.2021-0051

Alkaher I, Carmi N (2019) Is Population Growth an Environmental Problem? Teachers’ Perceptions and Attitudes towards Including It in Their Teaching. Sustainability 11. https://doi.org/10.3390/su11071994

Andresen S (2021) A Discretionary Toolkit: Reasoning When Teaching Controversial Issues in Norwegian Upper Secondary School. Professions & Professionalism 11. https://doi.org/10.7577/pp.4362

Arnold BP (2019) Where Do You Stand? Discussions That Promote Democratic Citizenship and Engage Multiple Intelligences. Journal of Education 199:99–107. https://doi.org/10.1177/0022057419848367

Ashcraft C (2012) But How Do We Talk About It?: Critical Literacy Practices for Addressing Sexuality With Youth. Curriculum Inquiry 42:597–628. https://doi.org/10.1111/j.1467-873X.2012.00610.x

Assaf LC, Delaney C (2013) A Journey Through Justice... Letting Go of the Power. The Teacher Educator 48:143–162. https://doi.org/10.1080/08878730.2013.771098

Baidoo-Anu D, Gyamerah K, Mahama I, Ofori-Sasu E (2023) Towards classroom inclusivity: exploring K-12 teachers’ sensitivity to cultural diversity (Hacia la inclusividad en el aula: explorando la sensibilidad a la diversidad cultural del profesorado de K-12). Culture and Education. https://doi.org/10.1080/11356405.2023.2200590

Beatty AE, Driessen EP, Clark AD, Costello RA, Ewell S, Fagbodun S, Klabacka RL, Lamb T, Mulligan K, Henning JA, Ballen CJ (2023) Biology Instructors See Value in Discussing Controversial Topics but Fear Personal and Professional Consequences. CBE Life Sci Educ 22. https://doi.org/10.1187/cbe.22-06-0108

Bengtsson J, Bolander E (2020) Strategies for inclusion and equality – ‘norm-critical’ sex education in Sweden. Sex Educ 20:154–169. https://doi.org/10.1080/14681811.2019.1634042

Berkman M, Plutzer E (2012) An evolving controversy: The Struggle to Teach Science in Science Classes. American Educator 36:12–40

Bossér U, Lundin M, Lindahl M, Linder C (2015) Challenges faced by teachers implementing socio-scientific issues as core elements in their classroom practices. European Journal of Science and Mathematics Education 3:159–176

Boyd AS, Glazier JA (2017) The Choreography of Conversation: An Exploration of Collaboration and Difficult Discussions in Cross Disciplinary Teacher Discourse Communities. The High School Journal 100:130–145. https://doi.org/10.1353/hsj.2017.0003

Boyd AS, Rose SG, Darragh JJ (2021) Shifting the Conversation around Teaching Sensitive Topics: Critical Colleagueship in a Teacher Discourse Community. Journal of Adolescent & Adult Literacy 65:129–137. https://doi.org/10.1002/jaal.1186

Branch G, Plutzer E, Reid A (2023) What’s effective and ineffective in preparing high school biology educators to teach evolution? Evidence from a representative national U.S. survey. Evolution: Education and Outreach 16. https://doi.org/10.1186/s12052-023-00181-x

Brauch N, Leone G, Sarrica M (2019) ‘The debate almost came to a fight…’ results of a cross-national explorative study concerning history teachers´ shared beliefs about teaching historical sensitive issues. Pedagogy, Culture & Society 27:111–132. https://doi.org/10.1080/14681366.2019.1566164

Brkich CA, Newkirk AC (2015) Interacting with Upset Parents/Guardians: Defending Justice-Oriented Social Studies Lessons in Parent-Teacher Conference Simulations. Theory Res Soc Educ 43:528–559. https://doi.org/10.1080/00933104.2015.1099485

Brotman JS, Mensah FM (2013) Urban high school students’ perspectives about sexual health decision-making: the role of school culture and identity. Cult Stud Sci Educ 8:403–431. https://doi.org/10.1007/s11422-012-9451-x

Carrion ML, Jensen RE (2014) Curricular decision-making among public sex educators. Sex Educ 14:623–634. https://doi.org/10.1080/14681811.2014.919444

Cassar C, Oosterheert I, Meijer PC (2021) The classroom in turmoil: teachers’ perspective on unplanned controversial issues in the classroom. Teachers and Teaching 27:656–671. https://doi.org/10.1080/13540602.2021.1986694

Cassar C, Oosterheert I, Meijer PC (2023) Why teachers address unplanned controversial issues in the classroom. Theory Res Soc Educ 51:233–263. https://doi.org/10.1080/00933104.2022.2163948

Chadwick R, McLoughlin E, Finlayson OE (2023) Teachers’ experience of inquiry into socioscientific issues in the Irish lower secondary science curriculum. Irish Educational Studies 42:315–337. https://doi.org/10.1080/03323315.2021.1964565

Chang-Bacon CK (2022) “We Sort of Dance Around the Race Thing”: Race-Evasiveness in Teacher Education. J Teach Educ 73:8–22. https://doi.org/10.1177/00224871211023042

Chong EK-M, Hu J, Tang HH, Cheng EC-K, Davies I, Leung Y, Hung SCF (2022) Hong Kong secondary school teachers’ pedagogical approaches to controversial issues at a time of social and political turmoil. Teacher Development 26:34–54. https://doi.org/10.1080/13664530.2021.1981427

Chowdhury T, Holbrook J, Reis P, Rannikmäe M (2022) Bangladeshi Science Teachers’ Perceived Importance and Perceived Current Practices in Promoting Science Education Through a Context-Based, Socio-scientific Framework. Sci Educ (Dordr) 31:487–523. https://doi.org/10.1007/s11191-021-00236-9

Chowdhury TBM, Siddique MNA (2017) An Explorative Study on the Null Secondary Science Curriculum in Bangladesh. Science Education International 28:147–155. https://doi.org/10.33828/sei.v28.i2.8

Christenson N, Walan S (2023) Developing Pre-service Teachers’ Competence in Assessing Socioscientific Argumentation. J Sci Teacher Educ 34:1–23. https://doi.org/10.1080/1046560X.2021.2018103

Dawson V (2012) Science teachers’ perspectives about climate change. Teaching Science 58:8–13

Dawson V (2023) Teachers’ support in developing year 7 students’ argumentation skills about water-based socioscientific issues. Int J Sci Educ. https://doi.org/10.1080/09500693.2023.2226334

Delale-O’Connor L, Graham DL (2019) Teachers’ Talk About Race and Caregiver Support: “You Can NEVER Be Too Sure About Parents.” Urban Educ (Beverly Hills Calif) 54:499–534. https://doi.org/10.1177/0042085918806941

Demir SB, Pismek N (2018) A Convergent Parallel Mixed-Methods Study of Controversial Issues in Social Studies Classes: A Clash of Ideologies. Educational Sciences: Theory & Practice 18:119–149. https://doi.org/10.12738/estp.2018.1.0298

DeMulder EK, Stribling SM, Day M (2014) Examining the immigrant experience: Helping teachers develop as critical educators. Teaching Education 25:43–64. https://doi.org/10.1080/10476210.2012.743984

Djono, Abidin NF, Salimi M (2021) Pursuing Historical Truth: The Discourse of History Teachers in Teaching the History of 30 September Movement in Indonesia. Educ Res Int 2021. https://doi.org/10.1155/2021/2671682

Dunlop L, Atkinson L, Turkenburg-van Diepen M (2021) The environment and politics in science education: the case of teaching fracking. Cult Stud Sci Educ 16:557–579. https://doi.org/10.1007/s11422-021-10017-z

Dunlop L, Veneu F (2019) Controversies in Science: To Teach or Not to Teach? Sci Educ (Dordr) 28:689–710. https://doi.org/10.1007/s11191-019-00048-y

Durham-Barnes JE (2015) Engaging Preservice Teachers in Critical Dialogues on Race. Sage Open 5. https://doi.org/10.1177/2158244015572505

Eidin E, Shwartz Y (2023) From Ideal to Practical—A Design of Teacher Professional Development on Socioscientific Issues. Sustainability 15. https://doi.org/10.3390/su151411394

Eikeland I, Frøyland M (2020) Pedagogical considerations when educators and researchers design a controversy-based educational programme in a science centre. NorDiNa 15:84–100

Ekborg M, Ottander C, Silfver E, Simon S (2013) Teachers’ Experience of Working with Socio-scientific Issues: A Large Scale and in Depth Study. Res Sci Educ 43:599–617. https://doi.org/10.1007/s11165-011-9279-5

Ender T (2021) Using counter-narratives to expand from the margins. Curriculum Inquiry 51:437–454. https://doi.org/10.1080/03626784.2021.1947733

Engebretson KE (2018) One novice teacher and her decisions to address or avoid controversial issues. The Journal of Social Studies Research 42:39–47. https://doi.org/10.1016/j.jssr.2017.03.001

Erlich RR, Gindi S (2019) Are civics teachers different from teachers of other disciplines in their handling of controversial issues? Educ Citizsh Soc Justice 14:118–130. https://doi.org/10.1177/1746197918767082

Erlich-Ron R, Gindi S (2021) Beyond allowing ventilation: How to connect the social- emotional and the cognitive in teachers’ handling of controversial political issues (CPI)? Citizenship Teaching & Learning 16:189–200. https://doi.org/10.1386/ctl_00046_1

Eryasar AS, Kilinc A (2022) The Coherence Between Epistemologies and SSI Teaching: A Multiple-Case Study with Three Science Teachers. Sci Educ (Dordr) 31:123–147. https://doi.org/10.1007/s11191-021-00200-7

Evren-Yapıcıoğlu A (2018) Advantages and disadvantages of socioscientific issue-based instruction in science classrooms. International Online Journal of Education and Teaching (IOJET) 5:361–374

Faisal, Martin SN (2022) Exploring Indonesian Biology Teachers’ Perceptions and Attitudes Towards Socio-Scientific Issues-Based Instruction. Asia-Pacific Science Education 8:256–291. https://doi.org/10.1163/23641177-bja10042

Flensner KK (2020a) Dealing with and teaching controversial issues - Teachers’ pedagogical approaches to controversial issues in Religious Education and Social Studies. Acta Didactica Norden 14. https://doi.org/10.5617/adno.8347

Flensner KK (2020b) Teaching Controversial Issues in Diverse Religious Education Classrooms. Religions (Basel) 11. https://doi.org/10.3390/rel11090465

Fung DC-L, Lui W-M (2017) Is Liberal Studies a political instrument in the secondary school curriculum? Lessons from the Umbrella Movement in post-colonial Hong Kong. Curric J 28:158–175. https://doi.org/10.1080/09585176.2016.1275727

Garrett HJ (2020) Containing classroom discussions of current social and political issues. Journal of Curriculum Studies 52:337–355. https://doi.org/10.1080/00220272.2020.1727020

Gaudelli W, Crocco M, Hawkins A (2012) Documentaries, Outtakes, and Digital Archives in Teaching Difficult Knowledge and the Vietnam War. Education and Society 30:5–25. https://doi.org/10.7459/es/30.2.02

Geller RC (2020) Teacher political disclosure in contentious times: A “responsibility to speak up” or “fair and balanced”? Theory Res Soc Educ 48:182–210. https://doi.org/10.1080/00933104.2020.1740125

Gibbs B (2022) The Foot and the Flag: Patriotism, Place, and the Teaching of War in a Military Town. Democracy & Education 28

Gibbs B (2021) “Strange Fruit”: Teaching the Present and Past of Racial Violence in the Rural South. Equity & Excellence in Education 54:165–181. https://doi.org/10.1080/10665684.2021.1951632

Gibbs B (2019) Patriotism, Pressure, and Place: Civic Agency in Base Country. Peabody Journal of Education 94:97–113. https://doi.org/10.1080/0161956X.2019.1553584

Gindi S, Erlich Ron R (2022) Interest over knowledge: A Jewish-Arab comparison of teachers’ willingness to conduct CPI discussions. Teachers and Teaching 28:690–702. https://doi.org/10.1080/13540602.2022.2097217

Gindi S, Erlich RR (2018) High school teachers’ attitudes and reported behaviors towards controversial issues. Teach Teach Educ 70:58–66. https://doi.org/10.1016/j.tate.2017.11.006

Gindi S, Erlich-Ron R (2021) Minority-Group Teachers‘ Different Attitudes toward Controversial Political Issues in Israel (Diferencias actitudinales de los docentes de grupos minoritarios en relación con las controversias políticas en Israel). Culture and Education 33:529–555. https://doi.org/10.1080/11356405.2021.1949112

Glanvill-Miller S (2017) ‘Teaching Maths is easier than this!’: Pre-service educators confront the challenges and opportunities of teaching emotive and contested pasts in post-apartheid history and social science classrooms. South African Historical Journal 69:52–69. https://doi.org/10.1080/02582473.2017.1278781

Goldberg T (2013) “It’s in my veins”: Identity and Disciplinary Practice in Students’ Discussions of a Historical Issue. Theory Res Soc Educ 41:33–64. https://doi.org/10.1080/00933104.2012.757265

Goldberg T, Wagner W, Petrović N (2019) From sensitive historical issues to history teachers’ sensibility: a look across and within countries. Pedagogy, Culture & Society 27:7–38. https://doi.org/10.1080/14681366.2019.1566165

Goldschmidt-Gjerløw B (2019) Children’s rights and teachers’ responsibilities: reproducing or transforming the cultural taboo on child sexual abuse? Human Rights Education Review 2:25–46. https://doi.org/10.7577/hrer.3079

Grund J, Brock A (2020) Education for Sustainable Development in Germany: Not Just Desired but Also Effective for Transformative Action. Sustainability 12. https://doi.org/10.3390/su12072838

Halabi R (2022) Civics curriculum in Arab schools: Teachers facing ethical and ideological dilemmas in the classroom. Curric J 33:396–409. https://doi.org/10.1002/curj.137

Hammer A (2023) Using forum theatre to address homosexuality as a controversial issue in religious education. British Journal of Religious Education 45:23–33. https://doi.org/10.1080/01416200.2021.2010652

Hammer A, Lenz C (2022) Exploring teacher agency to address controversial issues in religious education–a forum theatre and action research approach. Scandinavian Journal of Educational Research. https://doi.org/10.1080/00313831.2022.2130976

Hand M, Levinson R (2012) Discussing Controversial Issues in the Classroom. Educational Philosophy and Theory 44:614–629. https://doi.org/10.1111/j.1469-5812.2010.00732.x

Hanley N (2021) The contribution of empathy-based pedagogy in global citizenship education: Kazakhstani context. International Journal of Development Education and Global Learning 13:79–93. https://doi.org/10.14324/ijdegl.13.2.02

Hanley P, Bennett J, Ratcliffe M (2014) The Inter-relationship of Science and Religion: A typology of engagement. Int J Sci Educ 36:1210–1229. https://doi.org/10.1080/09500693.2013.853897

Hanna H (2017) Dealing with difference in the divided educational context: balancing freedom of expression and non-discrimination in Northern Ireland and Israel. Compare: A Journal of Comparative and International Education 47:17–31. https://doi.org/10.1080/03057925.2015.1119649

Hansson P-O (2023) Teaching Avatars on Controversial Issues: lessons learned. In: Menchaca MP (ed) Journal of Education: Technology in Education. pp 61–78

Hawley PH, Sinatra GM (2019) Declawing the dinosaurs in the science classroom: Reducing Christian teachers’ anxiety and increasing their efficacy for teaching evolution. J Res Sci Teach 56:375–401. https://doi.org/10.1002/tea.21479

Hayosh T, Paul-Binyamin I (2023) The severely divided Israeli society in quest of a socially-oriented pedagogy. Israel Affairs 29:680–699. https://doi.org/10.1080/13537121.2023.2206251

Hedayati N, Kuusisto E, Gholami K, Tirri K (2019) Moral conflicts in Iranian secondary schools. Journal of Beliefs and Values 40:464–476. https://doi.org/10.1080/13617672.2019.1618151

Helmer K (2015) “Everyone Needs a Class Like This”: High School Students’ Perspectives on a Gay and Lesbian Literature Course. Educ Forum 79:408–420. https://doi.org/10.1080/00131725.2015.1068421

Hintermann C, Edlinger H, Fasching M, Jekel T (2021) ’I learned a lot about my classmates… ’. Exploring focus group discussions as learning environment to raise controversial issues in geography and economic education. European Journal of Geography 12:016–030. https://doi.org/10.48088/ejg.c.hin.12.4.016.030

Hollstein MS (2022) Social Studies, Civics, and Fracking: Ohio Teacher Perceptions of Controversial Environmental Issues. Journal of Social Studies Education Research 13:1–34

Huang M, He P (2023) Pre-Service Science Teachers’ Understanding of Socio-Scientific Issues Instruction through a Co-Design and Co-Teaching Approach Amidst the COVID-19 Pandemic. Sustainability 15. https://doi.org/10.3390/su15108211

Hung Y-H (2019) Teacher as Stranger: “Releasing” Imagination for Teaching Controversial Public Issues. Journal of International Social Studies 9:56–74

Hung Y-H (2023) Exploration of teacher preparation for teaching controversial public issues. The Journal of Social Studies Research 47:120–128. https://doi.org/10.1016/j.jssr.2022.05.002

Hungerford-Kresser H, Wiggins JL, Amaro-Jimenez C (2014) Blogging with pre-service teachers as action research: When data deserve a second glance. Educ Action Res 22:325–339. https://doi.org/10.1080/09650792.2014.880361

Jahr D, Hempel C, Heinz M (2016) “…not simply say that they are all Nazis.” Controversy in discussions of current topics in German civics classes. Journal of Social Science Education 15:14–25. https://doi.org/10.4119/UNIBI/jsse-v15-i2-1481

Jerome L, Liddle A, Young H (2021) Talking about rights without talking about rights: on the absence of knowledge in classroom discussions. Human Rights Education Review 4:8–26. https://doi.org/10.7577/hrer.3979

Jett CC, Cross SB (2016) Teaching about Diversity in Black and White: Reflections and Recommendations from Two Teacher Educators. The New Educator 12:131–146. https://doi.org/10.1080/1547688X.2015.1058448

Jofré MIT, Stein RG (2019) Teachers’ Conceptions of and Lesson Plans for Teaching Controversial Issues: Limitations for Deploying Their Pedagogical Potential. Education as Change 23. https://doi.org/10.25159/1947-9417/3699

Jones JR (2012) Dismantling the Context and Breaking Free from Contextual Oppositions: How Teacher Education Programs Can Combat Homophobia. SRATE Journal 22:8–15

Joodaki K, Nedjat S, Dastjerdi MV, Larijani B (2020) Ethical considerations and challenges of sex education for adolescents in Iran: a qualitative study. J Med Ethics Hist Med 13. https://doi.org/10.18502/jmehm.v13i2.2664

Kaarlõp H-L, Oja M, Poom-Valickis K (2022) Teaching issues perceived to be controversial in history: Estonian teachers’ epistemic cognition. Journal of Social Science Education 21:99–126. https://doi.org/10.11576/jsse-4450

Kaka SJ, Littenberg-Tobias J, Kessner T, Francis AT, Kennett K, Marvez G, Reich J (2021) Digital Simulations as Approximations of Practice: Preparing Preservice Teachers to Facilitate Whole-Class Discussions of Controversial Issues. Journal of Technology and Teacher Education 29:67–90. https://doi.org/10.70725/033849xcjhvs

Kaloi M, Hopper JD, Hubble G, Niu ME, Shumway SG, Tolman ER, Jensen JL (2022) Exploring the Relationship between Science, Religion & Attitudes toward Evolution Education. Am Biol Teach 84:75–81. https://doi.org/10.1525/abt.2022.84.2.75

Kara Y (2012) Pre-service biology teachers’ perceptions on the instruction of socio-scientific issues in the curriculum. European Journal of Teacher Education 35:111–129. https://doi.org/10.1080/02619768.2011.633999

Kello K (2016) Sensitive and controversial issues in the classroom: teaching history in a divided society. Teachers and Teaching 22:35–53. https://doi.org/10.1080/13540602.2015.1023027

Kissling MT, Bell JT (2020) Teaching social studies amid ecological crisis. Theory Res Soc Educ 48:1–31. https://doi.org/10.1080/00933104.2019.1673267

Knippels M-CPJ, Van Harskamp M (2018) An educational sequence for implementing socio-scientific inquiry-based learning (SSIBL). Sci Soc 100:46–52

Koçoğlu E, Kalin ÖU, Demir FB (2022) Different perspective on teaching socio-scientific subjects. Journal of Education and Learning (EduLearn) 16:199–209. https://doi.org/10.11591/edulearn.v16i2.20446

Kunkle KA, Monroe MC (2019) Cultural cognition and climate change education in the U.S.: why consensus is not enough. Environ Educ Res 25:633–655. https://doi.org/10.1080/13504622.2018.1465893

Kuş Z (2015) Science and social studies teachers’ beliefs and practices about teaching controversial issues: Certain comparisons. Journal of Social Science Education 14:84–97. https://doi.org/10.2390/jsse-v14-i3-1385

Kuş Z, Öztürk D (2019) Social Studies Teachers’ Opinions and Practices Regarding Teaching Controversial Issues. Australian Journal of Teacher Education 44:14–37

Lee H (2022) Pedagogical and Epistemological Challenges of Pre-Service Science Teachers Teaching Socioscientific Issues. Asia-Pacific Science Education 8:301–330. https://doi.org/10.1163/23641177-bja10050

Lee H, Lee H, Zeidler DL (2020) Examining tensions in the socioscientific issues classroom: Students’ border crossings into a new culture of science. J Res Sci Teach 57:672–694. https://doi.org/10.1002/tea.21600

Lee H, Yang J (2017) Science Teachers Taking their First Steps toward Teaching Socioscientific Issues through Collaborative Action Research. Res Sci Educ 49:51–71. https://doi.org/10.1007/s11165-017-9614-6

Levine Rose S, Calabrese Barton A (2012) Should great lakes city build a new power plant? How youth navigate socioscientific issues. J Res Sci Teach 49:541–567. https://doi.org/10.1002/tea.21017

Levy BLM, Collet-Gildard L, Owenby TC (2017) Generating Dynamic Democratic Discussions: An Analysis of Teaching With U.S. Presidential Debates. The Social Studies 108:39–54. https://doi.org/10.1080/00377996.2016.1266594

Liddle A (2021) Classroom as heterotopia: English lessons as a space to problematise war. Br J Sociol Educ 42:951–967. https://doi.org/10.1080/01425692.2021.1971063

Lin AR, Lawrence JF, Snow CE (2015) Teaching urban youth about controversial issues: Pathways to becoming active and informed citizens. Citizenship, Social and Economics Education 14:103–119. https://doi.org/10.1177/2047173415600606

Lindström N, Samuelsson L (2022) On how RE teachers Address the Sometimes Conflicting Tasks of Conveying Fundamental Values and Facilitating Critical Thinking. Athens Journal of Education 9:23–36. https://doi.org/10.30958/AJE.9-1-2

Mahfuz MT, Sultana F, Hunter EC, Jahan F, Akand F, Khan S, Mobashhara M, Rahman M, Alam MU, Unicomb L, Luby SP, Winch PJ (2021) Teachers’ perspective on implementation of menstrual hygiene management and puberty education in a pilot study in Bangladeshi schools. Glob Health Action 14. https://doi.org/10.1080/16549716.2021.1955492

McGinley H, Keane E (2022) Traveller students being and relating to an/‘other’: identity, belonging, and inter-ethnic peer relationships in a highly diverse post-primary school. Irish Educational Studies 41:551–572. https://doi.org/10.1080/03323315.2022.2090412

Mcpherson A, Forster D, Kerr K (2023) Controversial issues in the Australian educational context: dimension of politics, policy and practice. Asia-Pacific Journal of Teacher Education 51:113–127. https://doi.org/10.1080/1359866X.2022.2152310

McSharry M, Cusack M (2016) Teachers’ Stories of Engaging Students in Controversial Action Projects on the Island of Ireland. Journal of Social Science Education 15:57–69. https://doi.org/10.4119/UNIBI/jsse-v15-i2-1497

Misco T (2013) “We do not talk about these things”: The promises and challenges of reflective thinking and controversial issue discussions in a Chinese high school. Intercultural Education 24:401–416. https://doi.org/10.1080/14675986.2013.842663

Nation MT, Feldman A (2022) Climate Change and Political Controversy in the Science Classroom: How Teachers’ Beliefs Influence Instruction. Sci Educ (Dordr) 31:1567–1583. https://doi.org/10.1007/s11191-022-00330-6

Nation MT, Feldman A (2021) Environmental Education in the Secondary Science Classroom: How Teachers’ Beliefs Influence Their Instruction of Climate Change. J Sci Teacher Educ 32:481–499. https://doi.org/10.1080/1046560X.2020.1854968

Niens U, O’Connor U, Smith A (2013) Citizenship education in divided societies: teachers’ perspectives in Northern Ireland. Citizensh Stud 17:128–141. https://doi.org/10.1080/13621025.2012.716214

Ollis D (2016) ‘I felt like I was watching porn’: the reality of preparing pre-service teachers to teach about sexual pleasure. Sex Educ 16:308–323. https://doi.org/10.1080/14681811.2015.1075382

Özbuğutu E (2022) Opinions of Science Teachers who are Graduate Students on Teaching Socio Scientific Issues. Bulletin of Education and Research 44:1–21

Öztürk N, Erabdan H (2019) The perception of science teachers on socio-scientific issues and teaching them. International Online Journal of Education and Teaching (IOJET) 6:960–982

Pace JL (2021) How can educators prepare for teaching controversial issues? Cross-national lessons. Social Education 85:228–233

Parodi E (2020) A critical investigation of Y7 students’ perceptions of Roman slavery as evidenced in the stories of the Cambridge Latin Course. The Journal of Classics Teaching 21:43–54. https://doi.org/10.1017/S2058631020000483

Parra SL, Wansink BGJ, Bakker C, van Liere LM (2023) Teachers stepping up their game in the face of extreme statements: A qualitative analysis of educational friction when teaching sensitive topics. Theory Res Soc Educ 51:201–232. https://doi.org/10.1080/00933104.2022.2145923

Paul-Binyamin I, Hayosh T (2021) ‘Safe Space’ for Jewish and Arab Teachers Dealing with Controversial Issues. Leadersh Policy Sch 369–384. https://doi.org/10.1080/15700763.2021.1965170

Pitiporntapin S, Thanapad A, Seomsuk N, Lankford DM (2015) Enhancing Pre-Service Science Teachers’ Practices According to Socio-scientific Issue (SSI)-Based Teaching through Collaborative Action Research. Asian Soc Sci 11:77–83. https://doi.org/10.5539/ass.v11n28p77

Pitiporntapin S, Yutakom N, Sadler TD (2016) Thai pre-service science teachers’ struggles in using Socio-scientific Issues (SSIs) during practicum. Asia-Pacific Forum on Science Learning and Teaching 17

Pratama S (2022) Teachers’ narratives about the possibility to teach controversial history of the 1965 affair in Indonesia. Br J Sociol Educ 43:898–915. https://doi.org/10.1080/01425692.2022.2070127

Puchner L, Klein NA (2012) Skirting the Issue: Teachers’ Experiences “Addressing Sexuality in Middle School Language Arts.” RMLE Online 36:1–16. https://doi.org/10.1080/19404476.2012.11462094

Quartermaine A (2017) The disposition of concern: an exploration into the affects of the power-knowledge dynamics uncovered during research into pupils’ perceptions of terrorism. International Journal of Research & Method in Education 40:541–553. https://doi.org/10.1080/1743727X.2016.1186631

Ramnarain U, Moleki B (2017) Teachers’ Use of Newspaper Articles in Promoting a Humanistic Perspective of Science in South Africa. J Sci Teacher Educ 28:205–217. https://doi.org/10.1080/1046560X.2017.1278654

Raudsepp M, Zadora A (2019) The sensitive scars of the Second World War in teaching European history. Pedagogy, Culture & Society 27:87–110. https://doi.org/10.1080/14681366.2019.1566270

Raven S, Jurkiewicz MA (2014) Preservice Secondary Science Teachers’ Experiences and Ideas about Bullying in Science Classrooms. Science Educator 23:65–72

Reilly J, Niens U (2014) Global citizenship as education for peacebuilding in a divided society: structural and contextual constraints on the development of critical dialogic discourse in schools. Compare: A Journal of Comparative and International Education 44:53–76. https://doi.org/10.1080/03057925.2013.859894

Relela ME, Mavuru L (2023) Life Sciences Teachers’ Pedagogical Content Knowledge When Addressing Socioscientific Issues in The Topic Evolution. International Journal of Learning, Teaching and Educational Research 22:302–318. https://doi.org/10.26803/ijlter.22.5.15

Reyes G, Aronson B, Batchelor KE, Ross G, Radina R (2021) Working in Solidarity: An Intersectional Self-Study Methodology as a Means to Inform Social Justice Teacher Education. Action in Teacher Education 43:353–369. https://doi.org/10.1080/01626620.2021.1883149

Richard G, Vallerand O, Petit M-P, Charbonneau A (2015) Discussing Sexual Orientation and Gender in Classrooms: A Testimonial-Based Approach to Fighting Homophobia in Schools. Educ Forum 79:421–435. https://doi.org/10.1080/00131725.2015.1068418

Riley T, Meston T, Ballangarry J, McCormack BA, Low-Choy S (2022) From yarning circles to zoom: navigating sensitive issues within indigenous education in an online space. International Journal of Inclusive Education. https://doi.org/10.1080/13603116.2022.2127501

Sabey D (2022) Relational Becoming: Considering Classroom Dialogue in Ethico-ontological Terms. Dialogic Pedagogy 10. https://doi.org/10.5195/dpj.2022.459

Sætra E (2022) An empirical moral philosophy perspective on classroom discussions of controversial issues. Educ Theory 72:641–662. https://doi.org/10.1111/edth.12548

Sanjakdar F (2013) Educating for sexual difference? Muslim teachers’ conversations about homosexuality. Sex Educ 13:16–29. https://doi.org/10.1080/14681811.2011.634154

Sarma H, Oliveras E (2013) Implementing HIV/AIDS Education: Impact of Teachers’ Training on HIV/AIDS Education in Bangladesh. J Health Popul Nutr 31:20–27. https://doi.org/10.3329/jhpn.v31i1.14745

Savenije GM, Goldberg T (2019) Silences in a climate of voicing: teachers’ perceptions of societal and self-silencing regarding sensitive historical issues. Pedagogy, Culture & Society 27:39–64. https://doi.org/10.1080/14681366.2019.1566162

Savenije GM, Wansink BGJ, Logtenberg A (2022) Dutch history teachers’ perceptions of teaching the topic of Islam while balancing distance and proximity. Teach Teach Educ 112. https://doi.org/10.1016/j.tate.2022.103654

Seow T, Ho L-C (2016) Singapore teachers’ beliefs about the purpose of climate change education and student readiness to handle controversy. International Research in Geographical and Environmental Education 25:358–371. https://doi.org/10.1080/10382046.2016.1207993

Shelton SA, Brooks T (2021) Queering the consent process: (un)masking participant identity in risky LGBTQ + teacher ally work. International Journal of Qualitative Studies in Education 34:812–829. https://doi.org/10.1080/09518398.2021.1942300

Shepler S, Williams JH (2017) Understanding Sierra Leonean and Liberian teachers’ views on discussing past wars in their classrooms. Comp Educ 53:418–441. https://doi.org/10.1080/03050068.2017.1338641

Siani M, Yarden A (2020) “Evolution? I Don’t Believe in It.” Sci Educ (Dordr) 29:411–441. https://doi.org/10.1007/s11191-020-00109-7

Siani M, Yarden A (2022) “I Think that Teachers Do Not Teach Evolution Because It Is Complicated”: Difficulties in Teaching and Learning Evolution in Israel. Int J Sci Math Educ 20:481–501. https://doi.org/10.1007/s10763-021-10179-w

Sibic O, Topcu MS (2020) Pre-service Science Teachers’ Views towards Socio-scientific Issues and Socio-scientific Issue-based Instruction. Journal of Education in Science, Environment and Health (JESEH) 6:268–281. https://doi.org/10.21891/jeseh.749847

Siegel-Stechler K, Callahan P (2022) Sensible or Stifled: What Public-school Teachers Know about Their First Amendment Speech Protections in the Classroom. Action in Teacher Education 44:160–177. https://doi.org/10.1080/01626620.2021.1997833

Siepmann P, Rumlich D, Matz F, Römhild R (2023) Attention to diversity in German CLIL classrooms: multi-perspective research on students’ and teachers’ perceptions. Int J Biling Educ Biling 26:1080–1096. https://doi.org/10.1080/13670050.2021.1981821

Simic-Muller K, Fernandes A, Felton-Koestler MD (2015) “I Just Wouldn’t Want to Get as Deep Into It”: Preservice Teachers’ Beliefs about the Role of Controversial Topics in Mathematics Education. Journal of Urban Mathematics Education 8:53–86

Stahi-Hitin R, Yarden A (2022) Should high-school biology teachers relate to students’ religious faith when teaching evolution? The perspective of Jewish teachers. Int J Sci Educ 44:1186–1207. https://doi.org/10.1080/09500693.2022.2070936

Stouthart T, Bayram D, van der Veen J (2023) Capturing Pedagogical Design Capacity of STEM Teacher Candidates: Education for Sustainable Development through Socioscientific Issues. Sustainability 15. https://doi.org/10.3390/su151411055

Strandberg M, Lindberg V (2012) Feedback in a multiethnic classroom discussion: a case study. Intercultural Education 23:75–88. https://doi.org/10.1080/14675986.2012.686018

Subiantoro AW, Treagust D, Tang K-S (2021) Indonesian Biology Teachers’ Perceptions about Socio-Scientific Issue-Based Biology Instruction. Asia-Pacific Science Education 7:452–476. https://doi.org/10.1163/23641177-bja10032

Sullivan SMB, Ledley TS, Lynds SE, Gold AU (2014) Navigating Climate Science in the Classroom: Teacher Preparation, Perceptions and Practices. Journal of Geoscience Education 62:550–559. https://doi.org/10.5408/12-304.1

Swanepoel EH, Beyers C, De Wet L (2017) Exploring judgement and internal bias of Life Orientation teachers in sexuality teaching. The Journal for Transdisciplinary Research in Southern Africa 13. https://doi.org/10.4102/td.v13i1.405

Tannebaum RP (2020) Controversial Public Issues in the Secondary Classroom Exploring Teachers’ Thoughts and Perceptions. Teacher Education Quarterly 47:7–26

Thein AH (2013) Language Arts Teachers’ Resistance to Teaching LGBT Literature and Issues. Language Arts 90:169–180. https://doi.org/10.58680/la201322101

Toft A (2020) When Terror Strikes: The 2015 Paris Attacks in Religious Education Classrooms in Norway. Religions (Basel) 11. https://doi.org/10.3390/rel11040208

Tribukait M (2021) Students’ prejudice as a teaching challenge: How European history educators deal with controversial and sensitive issues in a climate of political polarization. Theory Res Soc Educ 49:540–569. https://doi.org/10.1080/00933104.2021.1947426

Tropp LR, Rucinski CL (2022) How implicit racial bias and concern about appearing racist shape K-12 teachers’ race talk with students. Social Psychology of Education 25:697–717. https://doi.org/10.1007/s11218-022-09715-5

Uçak E, Şaka C (2022) The effect of using web 2.0 tools in the teaching of socio-scientific issues on pre-service science teachers. International Journal of Curriculum and Instruction 14:2679–2710

Walker J, Langan E (2016) Histlexia Observed in Training Pre-service Social Studies Teachers to Teach World Religions. Current Issues in Middle Level Education 21:15–23

Wansink BGJ, Timmer J, Bronkhorst LH (2023) Navigating Multiple Perspectives in Discussing Controversial Topics: Boundary Crossing in the Classroom. Educ Sci (Basel) 13:938. https://doi.org/10.3390/educsci13090938

Weeden K, Bright D (2020) Pre-service teacher attitudes towards discussing terrorism in English as an Additional Language (EAL) classrooms: citizenship, democratic practices, and the discussion of controversial issues. The Australian Educational Researcher 47:149–166. https://doi.org/10.1007/s13384-019-00333-3

Weiss M, Dreesmann DC (2014) Aspirations and Expectations: Comparing Scientist and Teacher Views as a Source of Ideas for Teaching Evolution. Universal Journal of Educational Research 2:421–431. https://doi.org/10.13189/ujer.2014.020504

West GB (2021) “Is this a safe space?”: Examining an emotionally charged eruption in critical language pedagogy. Educ Sci (Basel) 11. https://doi.org/10.3390/educsci11040186

Woolley M (2017) The attitudes and perceptions of beginning teachers in relation to teaching controversial issues in the history classroom. Revista Electrónica Interuniversitaria de Formación del Profesorado 20:1–16. https://doi.org/10.6018/reifop.20.1.284561

Yerdelen S, Cansiz M, Cansiz N, Akcay H (2018) Promoting Preservice Teachers’ Attitudes Toward Socioscientific Issues. J Educ Environ Sci Health 4:1–11. https://doi.org/10.21891/jeseh.387465

Zembylas M, Loukaides L (2021) Teachers’ strategies of everyday diplomacy in peace education: A case study of the “infrapolitics” of peacebuilding in Greek-Cypriot schools. Res Comp Int Educ 16:43–63. https://doi.org/10.1177/1745499921991649

Non teacher-related articles

Al-Adeimi S, Baumann J (2023) Roles of engagement: Analyzing adolescent students’ talk during controversial discussions. Journal of Adolescent & Adult Literacy 67:42–52. https://doi.org/10.1002/jaal.1289

Chang H-Y, Wu H-K, Hsu Y-S (2013) Integrating a mobile augmented reality activity to contextualize student learning of a socioscientific issue. British Journal of Educational Technology 44:E95–E99. https://doi.org/10.1111/j.1467-8535.2012.01379.x

Charalambous C (2023) Navigating liminality: young people’s political socialization in a conflict-affected context. Int J Soc Lang 279:131–154. https://doi.org/10.1515/ijsl-2022-0036

Choi Y, Lee H (2021) Exploring the Effects of Implementing a Research-Based SSI Program on Students’ Understanding of SSI and Willingness to Act. Asia-Pacific Science Education 7:477–499. https://doi.org/10.1163/23641177-bja10033

Christodoulou A, Levinson R, Davies P, Grace M, Nicholl J, Rietdijk W (2021) The use of Cartography of Controversy within socioscientific issues-based education: students’ mapping of the badger-cattle controversy in England. Int J Sci Educ 43:2479–2500. https://doi.org/10.1080/09500693.2021.1970852

Garrett HJ, Segall A, Crocco MS (2020) Accommodating Emotion and Affect in Political Discussions in Classrooms. The Social Studies 111:312–323. https://doi.org/10.1080/00377996.2020.1758015

Hackett C, Boyd E, Osnes B, Fahmy S, Simmons N (2023) Beyond rationality: the role of educator self-disclosure in sexual violence prevention education. Sex Educ 23:212–219. https://doi.org/10.1080/14681811.2022.2094355

Ikonen E, Ubani M (2014) Spiritual sensitivity in the classroom: a teaching experiment in finnish upper secondary religious education. International Journal of Children’s Spirituality 19:69–82. https://doi.org/10.1080/1364436X.2014.909387

Karahan E, Andzenge ST, Roehrig G (2017) Eliciting Students’ Understanding of a Local Socioscientific Issue Through the Use of Critical Response Pedagogies. International Journal of Education in Mathematics, Science and Technology 5:88–100. https://doi.org/10.18404/ijemst.93592

Klein S (2017) Preparing to Teach a Slavery Past: History Teachers and Educators as Navigators of Historical Distance. Theory Res Soc Educ 45:75–109. https://doi.org/10.1080/00933104.2016.1213677

Kohlmeier J, Saye JW (2014) Ethical Reasoning of U.S. High School Seniors Exploring Just Versus Unjust Laws. Theory Res Soc Educ 42:548–578. https://doi.org/10.1080/00933104.2014.966218

Lescarret C, Le Floch V, Sakdavong J-C, Boucheix J-M, Tricot A, Amadieu F (2023) The impact of students’ prior attitude on the processing of conflicting videos: a comparison between middle-school and undergraduate students. European Journal of Psychology of Education 38:519–544. https://doi.org/10.1007/s10212-022-00634-9

Lin Y-R, Hung J-F (2016) The analysis and reconciliation of students’ rebuttals in argumentation activities. Int J Sci Educ 38:130–155. https://doi.org/10.1080/09500693.2015.1134848

Misco T (2012) The importance of context for teaching controversial issues in international settings. International Education 42:69–106

Misco T, Lee L (2014) “There is no such thing as being Guamanian”: Controversial Issues in the Context of Guam. Theory Res Soc Educ 42:414–439. https://doi.org/10.1080/00933104.2014.906334

Mpeta M, De Villiers JJR, Fraser WJ (2014) Secondary school learners’ response to the teaching of evolution in Limpopo Province, South Africa. J Biol Educ 49:150–164. https://doi.org/10.1080/00219266.2014.914555

Nesterova Y (2019) Teaching Indigenous children in Taiwan: Tensions, complexities and opportunities. Global Studies of Childhood 9:156–166. https://doi.org/10.1177/2043610619846349

Palikidis A, Kokkinos G, Andreou A, Trantas P (2017) War and violence in history teaching: an empirical analysis of future teachers’ perspectives in Greece. In: Popp S, Furrer M, Gorbahn K, Haue H, Haydn T, van Eeden E, Wojdon J (eds) Yearbook of the International Society for History Didactics. pp 117–150

Sætra E (2021) Discussing Controversial Issues: Exploring the Role of Agonistic Emotions. Democracy & Education 29

Solli A, Hillman T, Mäkitalo Å (2019) Navigating the Complexity of Socio-scientific Controversies—How Students Make Multiple Voices Present in Discourse. Res Sci Educ 49:1595–1623. https://doi.org/10.1007/s11165-017-9668-5

Uçak E, Savran Gender A, Sevis A, Usta S (2022) Dialogic teaching on GMOs as a socio-scientific issue from the eyes of students. Pamukkale University Journal of Education 55:294–323. https://doi.org/10.9779.pauefd.1029432

Wahono B, Narulita E, Chang C-Y, Darmawan E, Irwanto I (2021) The Role of Students’ Worldview on Decision-Making: An Indonesian Case Study by a Socio-Scientific Issue-Based Instruction Through Integrated STEM Education. EURASIA Journal of Mathematics, Science and Technology Education 17. https://doi.org/10.29333/ejmste/11246

Wansink BG-J, Mol H, Kortekaas J, Mainhard T (2023) Discussing controversial issues in the classroom: Exploring students’ safety perceptions and their willingness to participate. Teach Teach Educ 125. https://doi.org/10.1016/j.tate.2023.104044

Yap SF, Dawson V (2014) The use of ethical frameworks: For implementing science as a human endeavour in year 10 biology. Teaching Science 60:17–33

Zummo L (2024) Climate Change and the Social World: Discourse Analysis of Students’ Intuitive Understandings. Sci Educ (Dordr) 33:811–830. https://doi.org/10.1007/s11191-022-00416-1

Appendix A. Articles of the systematic literature review.

# Appendix B: The codebook

Table B1

The codebook.

| Codes | Explanation and/or examples |
| --- | --- |
| Classification of topics | |
| Soft | When topic is given with the intention of introducing tension in the classroom |
| Hard | When topic is given without the intention of introducing tension in the classroom |
| Life | Concerning living systems |
| Non-life | Concerning non-living systems |
| Classification of context determinants into ecological systems | |
| Individual | All determinants dependent on the teacher’s characteristics, emotions and identities. |
| Microsystem | Teachers' direct interactions. |
| Mesosystem | Interactions where teacher is not a participant, but happen between different microsystems. These interactions influence the teacher through a microsystem. |
| Exosystem | Interactions where teacher is not a participant, but happen between elements of which at least one element is not positioned in the microsystem. These interactions influence the teacher through a microsystem. |
| Macrosystem | Interactions shared across micro-, meso-, or exosystems. |
| Chronosystem | The chronosystem focuses on time differences across all systems (e.g. the emergence of the Woke movement). |
| Domains | |
| Natural Sciences | All *hard* subjects: biology, physics, chemistry, mathematics,… subjects such as geography or physical and health education, which are not clearly *hard* or *soft*, are coded to both. |
| Social sciences and humanities | All *soft* subjects: psychology, sociology, history, languages, religion,… subjects such as geography or physical and health education, which are not clearly *hard* or *soft*, are coded to both. |
| Determinants | |
| Age difference | Age difference between teacher and student causes awkwardness to talk about certain subjects because of age difference |
| Age students | Whether topic is appropriate for the age group or whether students are mature enough |
| Class composition | E.g. number of students, ratio male-female students, diversity of students,… |
| Class management | When class management is hard, e.g. losing control of classroom, going in all directions, chaos, not being able to handle the situation,... |
| Classroom atmosphere | Whether the classroom is a safe space |
| Collegiality | Atmosphere, communication, ... between teachers |
| Context SCI | When context is determinative whether SCI is sensitive, e.g. impersonation of specific group of persons in class or in a comedy show |
| Culture | CT and PA stem from cultural values, beliefs. |
| Cultural identity | Cultural identity of teacher/student |
| Cultural intelligence | Teacher/students know about other (classmates') culture. They are open to learning more. |
| Curricular expectations | following/fitting/interpreting the curriculum and exams |
| Different perspectives | Different perspectives on certain subjects between students and teachers or students onderling |
| Discomfort | When student or teacher discomfort leads to more tension or pedagogic frailty |
| Distance of event | The spatial and/or temporal distance of events in history. Whether events happened closer in time or nearby/far away. |
| Dominant ideology | The dominant culture in culture/politics/ education. |
| Educational system | Support of education system, what it expects from teachers |
| Emotions | Inducing emotions, fear of emotions, emotional reactions to subject. Not including fear of students' reactions; only if these are emotional reactions |
| Empathy | Taking other person's perspective |
| Ethnicity | CT and PA stem from discussing race, ethnicity. |
| Ethnic ID det | Ethnical background of teacher/students |
| Family influences | What students learn from their families on the SCI |
| Gender | Tension from discussing gender, sexual orientation, but not applied to individual |
| Gender ID det | Gender orientation teacher/student |
| Group identity | Whether teacher/student values belonging to in-group. |
| Implementation of issues | When the implementation of SCIs in curriculum is difficult or when teachers cannot find appropriate SCIs |
| Interdisciplinarity | When teachers need more interdisciplinary communication or think a specific topic should be handled in another course |
| Media | Students/teacher has information on certain topic because of social media. They ask questions based on what they have seen on social media. |
| National ID det | Classroom tension stems from touching national identity. |
| Personal ambivalence | When teachers are ambivalent about a topic. |
| Politics | When the topic is too political, political viewpoint in society |
| Political identity | Political viewpoints of teacher or student, e.g. right-wing viewpoint of student. |
| Possibility of losing job position | When teachers are afraid of losing their job when teaching about a specific SCI. |
| Prejudices | Difficulties because of prejudices of students |
| Racism | Teacher/students react racist, do not want to work together because of other race/ethnic background. |
| Rating | When teachers find it difficult to rate a discussion on SCIs |
| Religion | Religion causes topic to be sensitive or controversial. |
| Spiritual identity | student's or teacher's religious beliefs. |
| Resources | Not enough / no reliable resources to implement SCIs |
| Role perception | What teacher perceives to be the role of the teacher. The role perception influences whether teachers teach sensitive and controversial topics, whether they think they have to discuss it or go into the topic. Exclusion of teacher neutrality (see teacher neutrality) |
| School environment | The culture within and surrounding the school. |
| Solving SCIs | Tensions because of wanting to solve SCIs, e.g. feeling helpless/overwhelmed |
| Stakeholders' reactions | (Angry) reactions towards teachers from parents, administrators, etc. |
| Student traits | Student personality and attitude |
| Student-teacher relationship | The relationship between teacher and student. More one-on-one than classroom atmosphere |
| Students' argumentations | Students lack the capacity to argue/express or form their opinion in classroom discussions |
| Students' CK | Whether the students have sufficient content knowledge about a certain sensitive or controversial topic or have difficulties understanding the SCI. They, for example, sometimes feel like they do not have enough knowledge to give accurate argumentation about a topic |
| Students' motivation | Whether students are motivated to learn/talk about a sensitive or controversial topic or when teacher has a hard time motivating their students |
| Students' reactions | The classroom tension stems from students' reactions or the fear of said reactions. Students can react emotionally. Also (fear of) students' resistance, fear of offending students, afraid of students starting to doubt, fear of students' actions (e.g. start to bully each other) |
| Teacher neutrality | The teacher does not want to disclose their own beliefs or values. They do not want to indoctrinate the students. Or when tension arises (with students) because the teacher is neutral, or teacher does not know if they have to be neutral |
| Teacher training | The teachers do not feel like they have enough knowledge/experience/training to be able to give a certain sensitive or controversial topic, they do not feel ready to teach the topic, afraid of responsibility, being up-to-date, afraid of teaching the material poorly |
| Teacher traits | Teacher personality and attitude |
| Teaching method | The classroom tension stems from the applied teaching method, e.g. dialogue, discussion, debate, etc. |
| Team work | Whether students and/or teacher want to work together in class. |
| Technology | The controversy or sensitivity stems from technology because of, for example, privacy reasons when students place videos of teachers online |
| Time constraint | When there is not enough time to prepare for teaching a sensitive or controversial topic; when during the lesson, there is not enough time to go into a certain topic. When teachers do not have enough time to implement the SCI because it requires a teaching method that requires more time, when curriculum allocates too little time for a specific issue, not enough class hours |
| Topic | The topic itself is sensitive or controversial |
| Touching personal experiences | When a topic speaks to a certain experience of the teacher or student |
| Way of communicating | The way a teacher or student expresses him- or herself in dialogue |
| Willingness to engage in discussion | Whether teacher or student is willing to engage in discussion about a sensitive and/or controversial topic |

*Note:* SCI = Sensitive and Controversial Issue, ID = identity, CT = Classroom Tension, PAs = protective approaches.

Appendix B. The codebook.

# Appendix C: Presence of Determinants per Domain

Table C1

Presence of Determinants per Domain.

| Determinants | Natural Sciences | | Social Sciences and Humanities | | Category |
| --- | --- | --- | --- | --- | --- |
|  | Absolute | Relative | Absolute | Relative |  |
| Teacher training | 31 | 48% | 23 | 20% | DS NS |
| Curricular expectations | 18 | 28% | 22 | 19% | SD |
| Students' CK | 18 | 28% | 2 | 2% | DS NS |
| Topic | 15 | 23% | 19 | 17% | SD |
| Time constraints | 14 | 22% | 6 | 5% | DS NS |
| Resources | 13 | 20% | 4 | 4% | DS NS |
| Teaching style | 10 | 15% | 21 | 19% | SD |
| Stakeholders' reactions | 10 | 15% | 20 | 18% | SD |
| Spiritual identity | 10 | 15% | 13 | 12% | SD |
| Age students | 10 | 15% | 3 | 3% | DS NS |
| Religion | 7 | 11% | 13 | 12% | SD |
| Teacher neutrality | 7 | 11% | 8 | 7% | SD |
| Class composition | 7 | 11% | 1 | 1% | DS NS |
| Different perspectives | 6 | 9% | 14 | 12% | SD |
| Class management | 6 | 9% | 13 | 12% | SD |
| Students' motivation | 6 | 9% | 1 | 1% |  |
| Implementation of issues | 6 | 9% | 0 | 0% | DS NS |
| Teacher traits | 5 | 8% | 4 | 4% |  |
| Students' argumentations | 5 | 8% | 0 | 0% | DS NS |
| School environment | 4 | 6% | 19 | 17% | DS SSH |
| Students' reactions | 4 | 6% | 18 | 16% | DS SSH |
| Culture | 4 | 6% | 4 | 4% |  |
| Emotions | 3 | 5% | 19 | 17% | DS SSH |
| Touching personal experiences | 3 | 5% | 16 | 14% | DS SSH |
| Family influences | 3 | 5% | 9 | 8% | SD |
| Student traits | 3 | 5% | 6 | 5% | SD |
| Politics | 3 | 5% | 5 | 4% |  |
| Personal ambivalence | 3 | 5% | 3 | 3% |  |
| Discomfort | 3 | 5% | 3 | 3% |  |
| Interdisciplinarity | 3 | 5% | 2 | 2% |  |
| Solving SCIs | 3 | 5% | 0 | 0% | DS NS |
| Rating | 3 | 5% | 0 | 0% | DS NS |
| Classroom atmosphere | 2 | 3% | 13 | 12% | DS SSH |
| Possibility of losing job position | 2 | 3% | 5 | 4% |  |
| Prejudices | 2 | 3% | 2 | 2% |  |
| Educational system | 2 | 3% | 0 | 0% |  |
| Role perception | 1 | 2% | 13 | 12% | DS SSH |
| Ethnic identity | 1 | 2% | 11 | 10% | DS SSH |
| Gender identity | 1 | 2% | 8 | 7% |  |
| Gender | 1 | 2% | 8 | 7% |  |
| Way of communicating | 1 | 2% | 7 | 6% |  |
| Ethnicity | 1 | 2% | 6 | 5% |  |
| Student-teacher relationship | 1 | 2% | 5 | 4% |  |
| Dominant ideology | 1 | 2% | 5 | 4% |  |
| National ID det | 0 | 0% | 7 | 6% | DS SSH |
| Political identity | 0 | 0% | 5 | 4% |  |
| Group identity | 0 | 0% | 5 | 4% |  |
| Cultural identity | 0 | 0% | 5 | 4% |  |
| Collegiality | 0 | 0% | 5 | 4% |  |
| Racism | 0 | 0% | 4 | 4% |  |
| Cultural intelligence | 0 | 0% | 3 | 3% |  |
| Willingness to engage in discussion | 0 | 0% | 2 | 2% |  |
| Technology | 0 | 0% | 2 | 2% |  |
| Team work | 0 | 0% | 2 | 2% |  |
| Media | 0 | 0% | 2 | 2% |  |
| Empathy | 0 | 0% | 2 | 2% |  |
| Distance of event | 0 | 0% | 1 | 1% |  |
| Age difference | 0 | 0% | 1 | 1% |  |
| Context SCI | 0 | 0% | 0 | 0% |  |

*Note:* DS = domain-specific, SD = shared determinants, NS = Natural Sciences, SSH = Social Sciences and Humanities. Number of articles in which a determinant is present is given (absolute) and their relative percentages (relative) in their domain. There can be multiple determinants be present in one article, hence the percentages in one domain not adding up to one hundred percent.

Appendix C. Presence of Determinants per domain.

# Appendix D: Continents and respectively the number of articles included

Table D1

Continents and respectively the number of articles included.

| Continent | Number of articles |
| --- | --- |
| Africa | 8 |
| Asia | 61 |
| Europe | 59 |
| North America | 58 |
| Oceania | 9 |
| South America | 1 |

Appendix D. Continents and the number of articles from that continent included in this systematic literature review.

# Appendix E: Number of Articles per SCI across Domains

Table E1

Number of articles per SCI across domains.

| SCIs | NS | SS | General |
| --- | --- | --- | --- |
| #MeToo | 0 | 1 | 1 |
| 1965 affair | 0 | 2 | 2 |
| abortion | 2 | 1 | 3 |
| age of the world | 1 | 0 | 1 |
| animal rights | 1 | 0 | 1 |
| Apartheid | 0 | 1 | 1 |
| Big Bang | 2 | 0 | 2 |
| capitalism | 0 | 1 | 1 |
| Christchurch Mosque Shootings | 0 | 1 | 1 |
| CLIL | 0 | 1 | 1 |
| coffee industry | 0 | 1 | 1 |
| Colonialism | 0 | 2 | 2 |
| Conflicts between groups | 0 | 15 | 15 |
| Cyprus vs Turkey | 0 | 1 | 1 |
| peace education programme | 0 | 1 | 1 |
| Israel vs Palestine | 0 | 12 | 12 |
| Russia vs Latvia - Estonia | 0 | 2 | 2 |
| conspiracy theories | 0 | 1 | 1 |
| culture | 0 | 2 | 2 |
| discrimination | 2 | 14 | 18 |
| racism | 2 | 12 | 16 |
| diseases | 6 | 3 | 8 |
| covid-19 | 1 | 0 | 1 |
| HIV - AIDS | 4 | 2 | 5 |
| mad cow disease | 1 | 0 | 1 |
| The Black Death | 0 | 1 | 1 |
| earthquakes | 1 | 0 | 1 |
| Eid Al-Adha | 0 | 1 | 1 |
| environment | 11 | 4 | 14 |
| bacterial resistance | 1 | 0 | 1 |
| climate change | 6 | 1 | 7 |
| sustainability | 2 | 1 | 3 |
| euthanasia | 1 | 0 | 1 |
| evolution | 13 | 0 | 13 |
| fertility | 1 | 0 | 1 |
| fire retardants | 1 | 0 | 1 |
| fracking | 1 | 1 | 2 |
| genetics | 7 | 0 | 7 |
| cloning | 1 | 0 | 1 |
| gene technology | 1 | 0 | 1 |
| GMOs | 1 | 0 | 1 |
| stem cells | 2 | 0 | 2 |
| hazards of humidifier steriliser | 1 | 0 | 1 |
| identity | 1 | 1 | 1 |
| immune system | 1 | 0 | 1 |
| Irish famine | 0 | 1 | 1 |
| law | 0 | 3 | 3 |
| causes of crime | 0 | 1 | 1 |
| gun rights | 0 | 2 | 2 |
| LGBTQIA+ | 2 | 17 | 19 |
| homophobia | 0 | 1 | 2 |
| mental health | 0 | 1 | 1 |
| depression | 0 | 1 | 1 |
| middle ages | 0 | 2 | 2 |
| The Crusades | 0 | 1 | 1 |
| migration | 0 | 7 | 7 |
| monument removal | 0 | 1 | 1 |
| multiculturalism | 0 | 1 | 1 |
| nuclear energy | 2 | 1 | 3 |
| oppression | 0 | 1 | 1 |
| patriotism | 0 | 2 | 2 |
| politics | 0 | 6 | 6 |
| poverty | 1 | 1 | 2 |
| race | 0 | 6 | 6 |
| radiation | 1 | 0 | 1 |
| religion | 0 | 12 | 12 |
| Catholic vs Protestant | 0 | 1 | 1 |
| Islam | 0 | 2 | 2 |
| The Reformation | 0 | 1 | 1 |
| sex and nudity | 9 | 10 | 15 |
| menstruation | 0 | 1 | 1 |
| polygamy | 0 | 1 | 1 |
| pregnancy | 2 | 0 | 2 |
| puberty | 0 | 1 | 1 |
| sexual abuse | 0 | 2 | 2 |
| slavery | 0 | 3 | 3 |
| socialism | 0 | 2 | 2 |
| space research | 1 | 0 | 1 |
| stereotypes | 0 | 1 | 1 |
| surgeries | 3 | 0 | 3 |
| artificial retinal transplantation | 1 | 0 | 1 |
| organ donation or transplantation | 2 | 0 | 2 |
| syndromes | 1 | 0 | 1 |
| terrorism | 0 | 8 | 8 |
| Paris attacks | 0 | 3 | 3 |
| Umbrella movement | 0 | 1 | 1 |
| vaccines | 1 | 0 | 1 |
| violence | 0 | 1 | 1 |
| war | 0 | 9 | 9 |
| Armenian genocide | 0 | 1 | 1 |
| Balkan wars | 0 | 1 | 1 |
| Civil war | 0 | 1 | 1 |
| nuclear weapons | 0 | 2 | 2 |
| Rwandan genocide | 0 | 1 | 1 |
| Syria | 0 | 1 | 1 |
| Vietnam war | 0 | 2 | 2 |
| WWII | 0 | 6 | 6 |
| Holocaust | 0 | 3 | 3 |
| word generation programme | 0 | 1 | 1 |

Appendix E. Number of articles per SCI across domains.
